# Supplementary material for: A porous Ni3N nanosheet array as a high-performance non-noble-metal catalyst for urea-assisted electrochemical hydrogen production
Source: Royal Society of Chemistry journal article supplement (doi:10.1039/c7qi00185a), 2017-01-01
Supplement: c7qi00185a1.pdf [file c7qi00185a1.pdf]

## Electronic Supplementary Information

### Experimental Section

**Materials:**  $\text{Ni}(\text{NO}_3)_2 \cdot 6\text{H}_2\text{O}$  was purchased from Aladdin Ltd. in Shanghai. Ammonium fluoride ( $\text{NH}_4\text{F}$ ), urea and nitric acid ( $\text{HNO}_3$ ) were purchased from Beijing Chemical Works. Acetone and ethanol were purchased from Tianjin Chemical Corporation. Carbon cloth (CC) was provided by Hongshan District, Wuhan Instrument Surgical Instruments business, and was cleaned by sonication sequentially in acetone, water and ethanol several times to remove the surface impurities. The water used throughout all experiments was purified through a Millipore system.

**Preparation of  $\text{Ni}(\text{OH})_2$  NA/CC and  $\text{Ni}_3\text{N}$  NA/CC:** In a typical procedure, 4.5 mmol  $\text{Ni}(\text{NO}_3)_2 \cdot 6\text{H}_2\text{O}$ , 8 mmol  $\text{NH}_4\text{F}$  and 20 mmol urea were dissolved in 80 mL distilled water and stirred to form a clear solution. Then the above solution and a piece of cleaned CC (2 cm  $\times$  3 cm) were transferred to a 50 mL Teflon-lined stainless-steel autoclave and maintained at 120 °C for 6 h. After the autoclave cooled down naturally, the resulting CC was taken out and washed with distilled water and ethanol, followed by drying 2 h at 60 °C to obtain  $\text{Ni}(\text{OH})_2$  NA/CC. To prepare  $\text{Ni}_3\text{N}$  NA/CC,  $\text{Ni}(\text{OH})_2$  NA/CC was placed in a tube furnace, and heated at 380 °C for 3 h with a heating speed of 5 °C  $\text{min}^{-1}$  in  $\text{NH}_3$  atmosphere, and then naturally cooled to ambient temperature under  $\text{NH}_3$ . Finally, the black  $\text{Ni}_3\text{N}$  NA/CC were collected for further characterization.

**Characterizations:** XRD data were acquired on a RigakuD/MAX 2550 diffractometer with Cu  $K\alpha$  radiation ( $\lambda=1.5418 \text{ \AA}$ ). SEM images were collected on a XL30 ESEM FEG scanning electron microscope at an accelerating voltage of 20 kV. TEM images were collected on a HITACHI H-8100 electron microscopy (Hitachi, Tokyo, Japan) with an accelerating voltage of 200 kV. XPS measurements were performed using an ESCALABMK II X-ray photoelectron spectrometer with the exciting source of Mg.

**Electrochemical measurements:** Electrochemical measurements were performed

with a CHI 660E electrochemical analyzer (CH Instruments, Inc., Shanghai) in a standard three-electrode system using Ni<sub>3</sub>N NA/CC as the working electrode, a platinum wire as counter electrode and Hg/HgO as the reference electrode. The potentials reported in this work were calibrated to RHE, using the following equation:  $E(\text{RHE}) = E(\text{Hg/HgO}) + (0.098 + 0.059 \text{ pH}) \text{ V}$ . Polarization curves were obtained by linear sweep voltammetry with a scan rate of 5 mV s<sup>-1</sup>. All experiments were carried out at 25 °C.

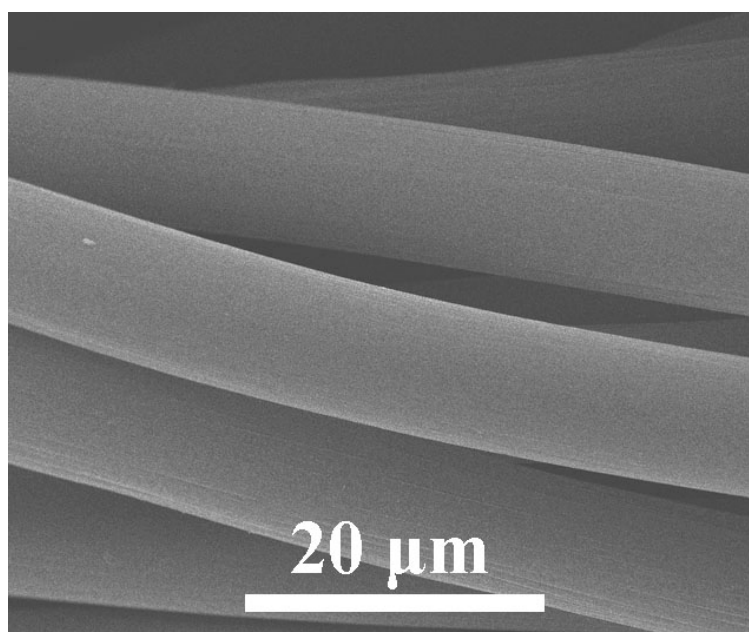

**Fig. S1.** SEM image of bare CC.

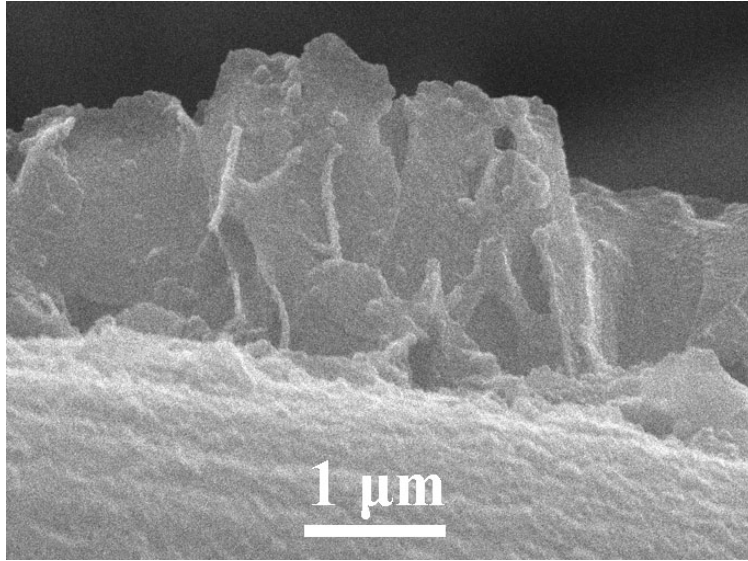

**Fig. S2.** Cross-section SEM image of Ni<sub>3</sub>N NA/CC.

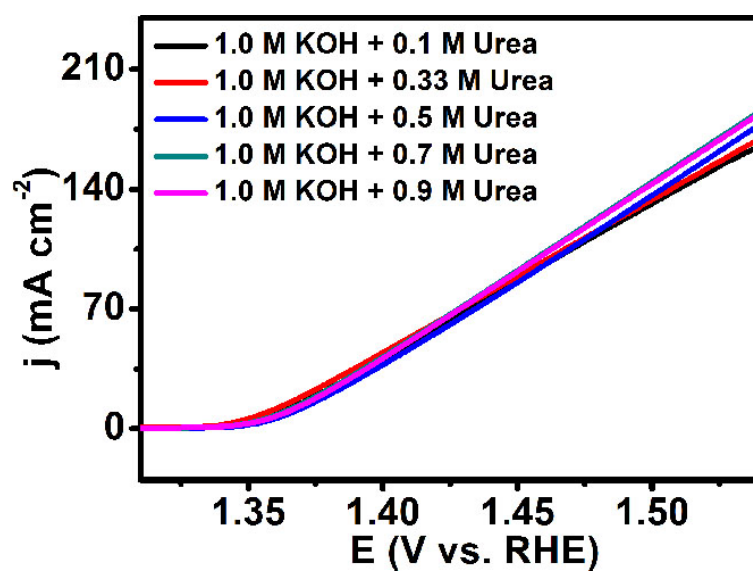

**Fig. S3.** LSV curves of Ni<sub>3</sub>N NA/CC in 1.0 M KOH with 0.1, 0.33, 0.5, 0.7, and 0.9 M urea.

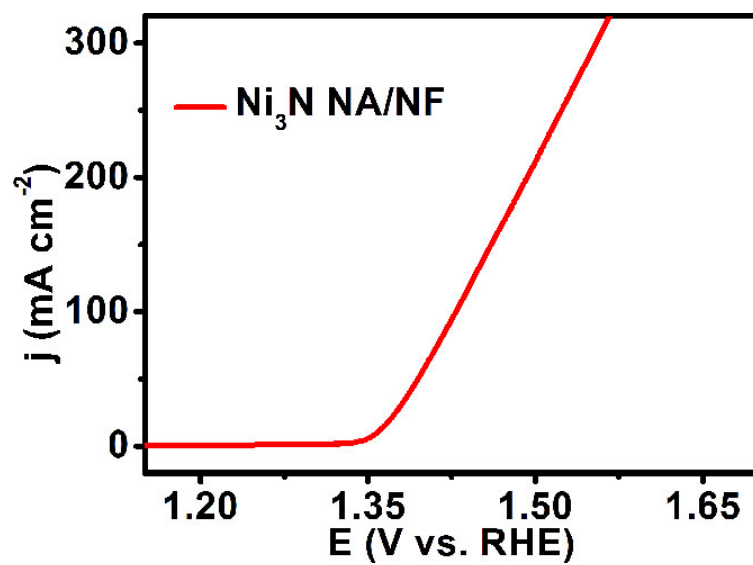

**Fig. S4.** LSV curves of Ni<sub>3</sub>N NA/NF in 1.0 M KOH with 0.33 M urea.

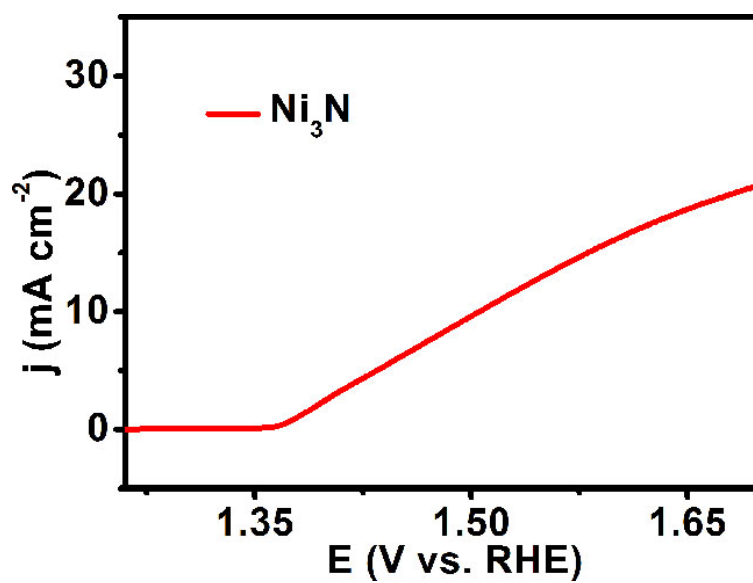

**Fig. S5.** LSV curves of pure  $\text{Ni}_3\text{N}$  in 1.0 M KOH with 0.33 M urea.

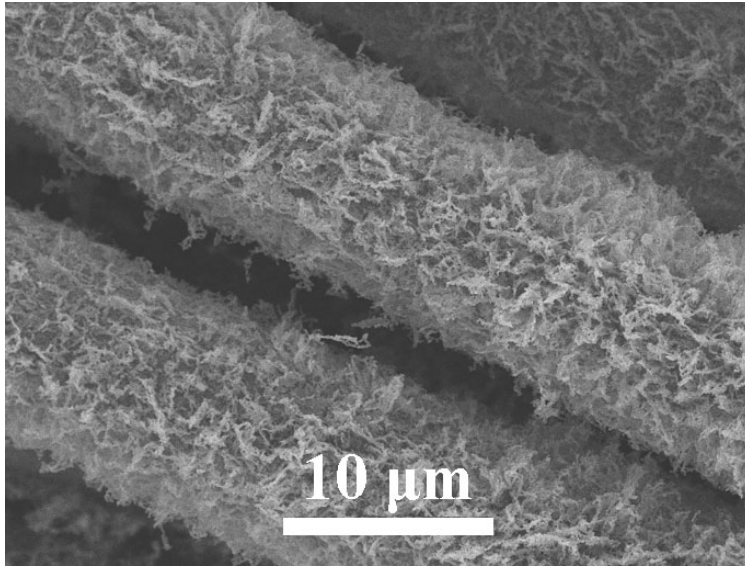

**Fig. S6.** SEM images for Ni<sub>3</sub>N NA/CC after long stability test.



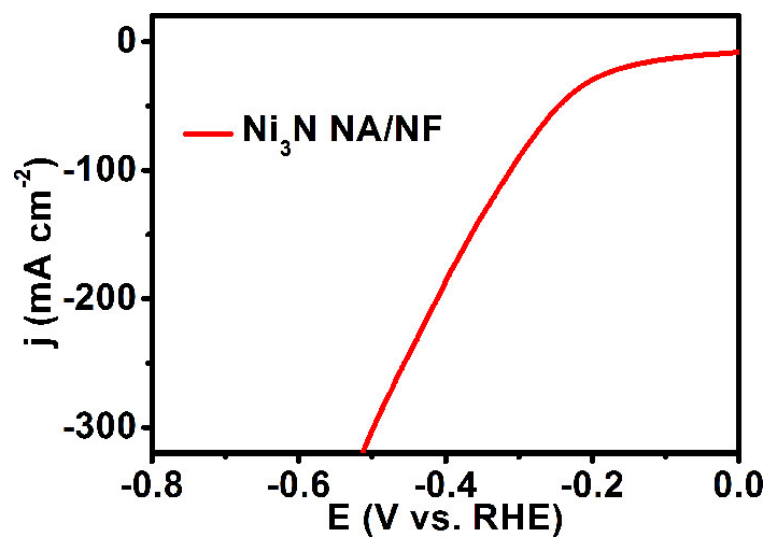

**Fig. S7.** LSV curves of Ni<sub>3</sub>N NA/NF in 1.0 M KOH with 0.33 M urea.

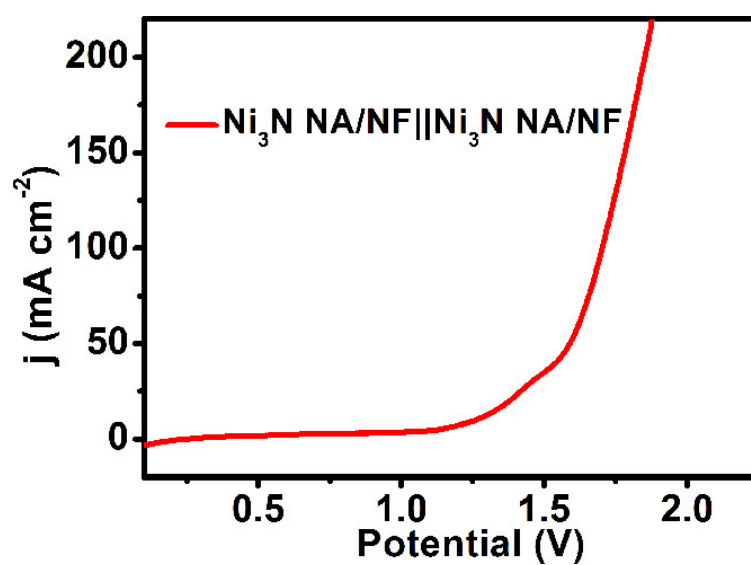

**Fig. S8.** Polarization curves for Ni<sub>3</sub>N NA/NF||Ni<sub>3</sub>N NA/NF in 1.0 M KOH with 0.33 M urea at scan rate of 5 mV s<sup>-1</sup>.

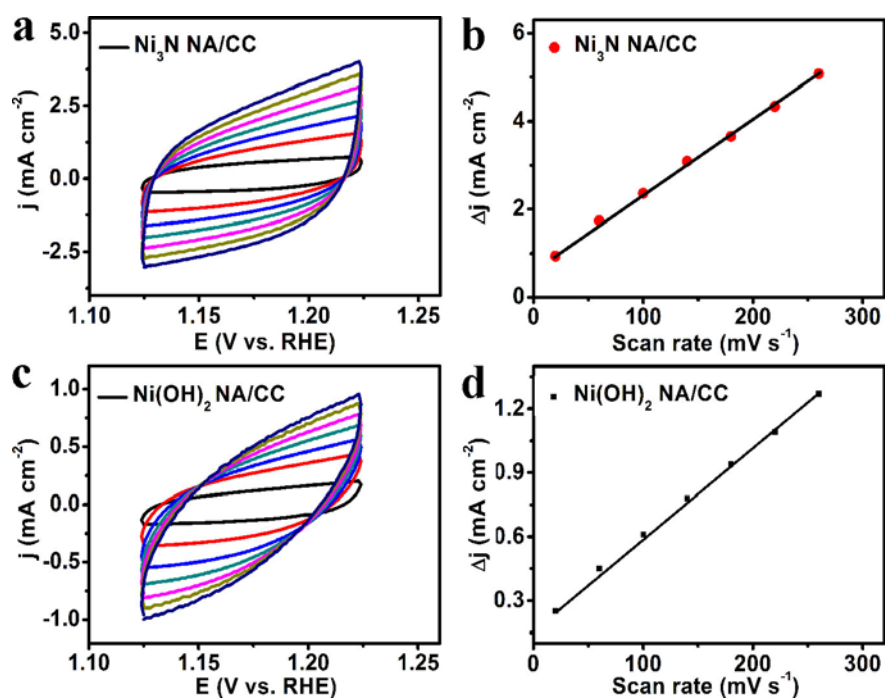

**Fig. S9.** (a) Ni<sub>3</sub>N NA/CC and (c) Ni(OH)<sub>2</sub> NA/CC in the non-faradaic capacitance current range at scan rates of 20, 60, 100, 140, 180, 220 and 260 mV s<sup>-1</sup>. (b) and (d) the capacitive currents at 1.175 V as a function of scan rate for Ni<sub>3</sub>N NA/CC and Ni(OH)<sub>2</sub> NA/CC.

**Table S1.** Comparison of the UOR activity for several recently reported catalysts.

| Catalyst                        | Potential at 10 mA<br>cm <sup>-2</sup> (V vs. RHE) | Mass loading<br>(mg cm <sup>-2</sup> ) | Ref.      |
|---------------------------------|----------------------------------------------------|----------------------------------------|-----------|
| L-MnO <sub>2</sub>              | 1.37                                               | 1.5                                    | 1         |
| Ni <sub>2</sub> P NF            | 1.37                                               | 0.92                                   | 2         |
| Ni(OH) <sub>2</sub> nanosheet   | 1.52                                               | 0.125                                  | 3         |
| Rhodium-Ni                      | 1.47                                               | 0.7                                    | 4         |
| Ni(OH) <sub>2</sub> nanotube-NF | 1.41                                               | -                                      | 5         |
| Graphene Ni(OH) <sub>2</sub>    | 1.52                                               | 0.25                                   | 6         |
| Ni(OH) <sub>2</sub> nanocube    | 1.55                                               | 0.3                                    | 7         |
| NiO nanosheet array             | 1.38                                               | 0.27                                   | 8         |
| NiMo sheet array                | 1.37                                               | 0.75                                   | 9         |
| NiCo alloy                      | 1.53                                               | 10                                     | 10        |
| Pt                              | 1.50                                               | 2.5                                    | 11        |
| Ni foil                         | 1.40                                               | 2                                      | 12        |
| Rh-Ni                           | 1.44                                               | 2                                      | 12        |
| Nickel nanowire                 | 1.44                                               | 1.3                                    | 13        |
| Nickel film                     | 1.48                                               | 1.3                                    | 13        |
| ERGO-Ni                         | 1.45                                               | -                                      | 14        |
| Ni <sub>3</sub> N NA/CC         | 1.35                                               | 1.90                                   | This work |

## Reference

- 1 S. chen, J.Duan, A. Vasileff and S. Qiao, *Angew. Chem., Int. Ed.*, 2016, **128**, 3868–3872.
- 2 D. Liu, T. Liu, L. Zhang, F. Qu, A. Asiri and X. Sun, *J. Mater. Chem. A.*, 2017, **5**, 3208–3213.
- 3 D. Wang, W. Yan and G. Botte, *Electrochem. Commun.*, 2011, **13**, 1135–1138.
- 4 A. Miller, B. Hassler and G. Botte, *J. Appl. Electrochem.*, 2012, **42**, 925–934.
- 5 R. Ji, D. Chan, J. Jow and M. Wu, *Electrochem. Commun.*, 2013, **29**, 21–24.
- 6 D. Wang, W. Yan, S. Vijapur and G. Botte, *Electrochim. Acta*, 2013, **89**, 732–736.
- 7 M. Wu, R. Ji and Y. Zheng, *Electrochim. Acta*, 2014, **144**, 194–199.
- 8 M. Wu, G. Lin and R. Yang, *J. Power Sources*, 2014, **272**, 711–718.
- 9 Y. Liang, Q. Lin, A. Asiri and X. Sun, *Electrochim. Acta*, 2015, **153**, 456–460.
- 10 W. Xu, H. Zhang, G. Li and Z. Wu, *Sci. Rep.*, 2014, **4**, 5863.
- 11 B. Boggs, R. King and G. Botte, *Chem. Commun.*, 2009, **32**, 4859–4861.
- 12 R. King and G. Botte, *J. Power Sources*, 2011, **196**, 9579–9584.
- 13 W. Yan, D. Wang, L. Diaz and G. Botte, *Electrochim. Acta*, 2014, **134**, 266–271.
- 14 D. Wang, W. Yan, S. Vijapur and G. Botte, *Electrochim. Acta*, 2013, **89**, 732–736.
